# Supplementary material for: Evolutionary Analysis of Cystatins of Early-Emerging Metazoans Reveals a Novel Subtype in Parasitic Cnidarians
Source: MDPI journal article supplement (doi:10.3390/biology10020110), 2021-02-03
Supplement: s1 [file s1]

**Table S2.** List of myxozoan species with information on primers used for PCR verification of stefin genes.

| Myxozoan species                        | Host species               | Host organ          | Locality                                | Primer name and sequence                           | Amplified region (bp) from DNA/cDNA | GenBank Acc. nr. |
|-----------------------------------------|----------------------------|---------------------|-----------------------------------------|----------------------------------------------------|-------------------------------------|------------------|
| <i>Sphaerospora molnari</i>             | <i>Cyprinus carpio</i>     | Blood, gills        | Malá Outrata, Czech Republic            | Sm1_5UTR_F: 5'-CGGACCGAGAGATTACGGTTA-3'            | 395/359                             | MT127416         |
|                                         |                            |                     |                                         | Sm1_5UTR_R: 5'-TTTTTAGGGACAAAAGTGAAAAGA-3'         |                                     |                  |
|                                         |                            |                     |                                         | Sm2_5UTR_F: 5'-GGATGGAAGATCAACGACCT-3'             | 524/450                             | MT127417         |
|                                         |                            |                     |                                         | Sm2_5UTR_R: 5'-GTTTTATGTGAATTTAGAACGAAAAGC-3'      |                                     |                  |
| <i>Ceratonova shasta</i> (IIR genotype) | <i>Oncorhynchus mykiss</i> | Intestine, ascites  | Willamette River, Oregon, USA           | Cs_5UTR_F: 5'-CGCATGCCAATATATTATTATCCTA-3'         | 356/313                             | MT127418         |
|                                         |                            |                     |                                         | Cs_3UTR_R: 5'-TAGAAAGGAAATGTCATAGAAAACCTCT-3'      |                                     |                  |
| <i>Myxidium lieberkuehni</i>            | <i>Esox lucius</i>         | Urinary bladder     | Třeboň pond area, Czech Republic        | MLStef1_1F: 5'-CGTAATTCTCGGCGTATATTGATA-3'         | 584/548                             | MT127419         |
|                                         |                            |                     |                                         | MLStef1_1R: 5'-TCAGATTTCTGTTACATTCATCCAT-3'        |                                     |                  |
|                                         |                            |                     |                                         | MLStef1_2F: 5'-GGCGTGTATTTGCTGATGAAATA-3'          | 384/352                             | MT127420         |
|                                         |                            |                     |                                         | MLStef1_2R: 5'-TATTAATCTATTTGGCTTGCCCTGG-3'        |                                     |                  |
|                                         |                            |                     |                                         | MLStef2_4F: 5'-GCGGCGTTAACAGATTATTAAGAAT-3'        | 432/401                             | MT127421         |
|                                         |                            |                     |                                         | MLStef2_4R: 5'-AGTTTTCTGCATAGTTTAAACAGCT-3'        |                                     |                  |
|                                         |                            |                     |                                         | MLStef3_1F: 5'-TTAAACGACAACCTACCTATCACGAC-3'       | 552/522                             | MT127422         |
|                                         |                            |                     |                                         | MLStef3_1R: 5'-TGTAGTTAAATCAATCAAAGAATAA-3'        |                                     |                  |
|                                         |                            |                     |                                         | MLStef4_1F: 5'-AGAAGACTGGAGATTAGCTAATAAA-3'        | 516/486                             | MT127423         |
|                                         |                            |                     |                                         | MLStef4_1R: 5'-CACGCACTAATATTTTCACATTTAT-3'        |                                     |                  |
| <i>Nephrocystidium pickii</i>           | <i>Esox lucius</i>         | Kidney              | Třeboň pond area, Czech Republic        | MLlikeStef1F: 5'-TATAGTAGAGATGGTTCCATTTGCG-3'      | 409/374                             | MT127424         |
|                                         |                            |                     |                                         | MLlikeStef1R: 5'-CCTCGGCATAGATTGTAACTTAATGT-3'     |                                     |                  |
| <i>Tetracapsuloides bryosalmonae</i>    | <i>Oncorhynchus mykiss</i> | Trunk kidney        | River Test, Hampshire, England          | Tbryosteffout: 5'-TTCTTATATTTAATTGTAATGTTGGGAGG-3' | 355/302                             | MT127425         |
|                                         |                            |                     |                                         | TbryostefRout: 5'-AGTGTTTCTTTCTACTCTAACTGA-3'      |                                     |                  |
| <i>Buddenbrockia plumatellae</i>        | <i>Leuciscus idus</i>      | Kidney              | Dyje river, Brno, Czech Republic        | BuddStefF: 5'-ATGCTGGGAGGATTCAAGGAAGTTAAA-3'       | 300/236                             | MT127426         |
|                                         |                            |                     |                                         | BuddStefR: 5'-AGTCCACTTCCATGACATGGTAGTTTTTC-3'     |                                     |                  |
| <i>Enteromyxum leei</i>                 | <i>Sparus aurata</i>       | Posterior intestine | Western Mediterranean, Castellón, Spain | Eleei_Stef3out_F: 5'-CTAAACAAAATTTTCGTAGCGTCTCC-3' | NA/525                              | MW498387         |
|                                         |                            |                     |                                         | Eleei_Stef3out_R: 5'-AAGTAGTGAGTGAATTTATAGTTC-3'   |                                     |                  |
| <i>Enteromyxum scophthalmi</i>          | <i>Psetta maxima</i>       | Anterior intestine  | Galicia, NW Spain                       | Escop_Stef1out_F: 5'-AGAAACAAAAGAAGTTCTAATCCTCT-3' | 543/408                             | MW498388         |
|                                         |                            |                     |                                         | Escop_Stef1out_R: 5'-TTGTGTGTTACGATTACTATTTTC-3'   |                                     |                  |

|  |  |  |  |                                                     |         |          |
|--|--|--|--|-----------------------------------------------------|---------|----------|
|  |  |  |  | Escop_Stef2out_F: 5'-AGTTTAAGATATGCTGAAGATCGCT-3'   | 486/427 | MW498389 |
|  |  |  |  | Escop_Stef2out_R: 5'-TCATAAACAAAGATAAGAGGACTC-3'    |         |          |
|  |  |  |  | Escop_Stef3out_F: 5'-ACTCAAGTATAGTAAGAACAAGATGCT-3' | 463/400 | MW498390 |
|  |  |  |  | Escop_Stef3out_R: 5'-TGAACGTGTTAATATTCAGTAAGCA-3'   |         |          |

NA: not available; sequence amplified only from the cDNA template.
