# Supplementary material for: Evolutionary Analysis of Cystatins of Early-Emerging Metazoans Reveals a Novel Subtype in Parasitic Cnidarians
Source: MDPI journal article supplement (doi:10.3390/biology10020110), 2021-02-03
Supplement: s1 [file s1]

**Supplementary Table 1.** Next generation sequencing data of choanoflagellates and early-diverging metazoans and number of cystatin homologues mined for each species and used for phylogenetic analyses. The life cycle stage sequenced is specified (underlined> for *Edwardsiella* spp. and *Polypodium hydriforme*.

| Taxonomic group/Species                     | GenBank identifier/Type of database                 | Reference                                                                                | Classical stefins | Atypical stefins | Type 2 cystatins | Multi-domain cystatins |
|---------------------------------------------|-----------------------------------------------------|------------------------------------------------------------------------------------------|-------------------|------------------|------------------|------------------------|
| <b>CHOANOFLAGELLATA</b>                     |                                                     |                                                                                          |                   |                  |                  |                        |
| <i>Codosiga hollandica</i>                  | GGOV01000000/TSA                                    | (Richter, et al. 2018)                                                                   | 1                 | 0                | 0                | ?                      |
| <i>Hartaetosiga balthica</i>                | GGOO00000000/TSA                                    | (Richter, et al. 2018)                                                                   | 1                 | 0                | 0                | ?                      |
| <i>Hartaetosiga gracilis</i>                | GGOU01000000/TSA                                    | (Richter, et al. 2018)                                                                   | 1                 | 0                | 0                | ?                      |
| <i>Choanoeca perplexa</i>                   | GGOP01000000/TSA                                    | (Richter, et al. 2018)                                                                   | 1                 | 0                | 0                | ?                      |
| <i>Microstomoeca roanoka</i>                | GGON01000000/TSA                                    | (Richter, et al. 2018)                                                                   | 1                 | 0                | 0                | ?                      |
| <i>Monosiga brevicollis</i>                 | ABFJ01000000/WGS                                    | (King, et al. 2008)                                                                      | 1                 | 0                | 0                | ?                      |
| <i>Mylnosiga fluctuans</i> <sup>x</sup>     | GGOI00000000/TSA                                    | (Richter, et al. 2018)                                                                   | 1                 | 0                | 0                | 1                      |
| <i>Salpingoeca dolichothecata</i>           | GGOK01000000/TSA                                    | (Richter, et al. 2018)                                                                   | 1                 | 0                | 0                | ?                      |
| <i>Salpingoeca helianthica</i>              | GGOJ01000000/TSA                                    | (Richter, et al. 2018)                                                                   | 1                 | 0                | 0                | 1                      |
| <i>Salpingoeca infusionum</i>               | GGOW00000000/TSA                                    | (Richter, et al. 2018)                                                                   | 1                 | 0                | 0                | ?                      |
| <i>Salpingoeca rosetta</i>                  | ACSY01000000/WGS                                    | (Fairclough, et al. 2013)                                                                | 1                 | 0                | 0                | ?                      |
| <b>PLACOZOA</b>                             |                                                     |                                                                                          |                   |                  |                  |                        |
| <i>Trichoplax adhaerens</i>                 | ABGP01000000/WGS<br>GFSG00000000/TSA                | (Srivastava, et al. 2008)<br>(Kamm, et al. 2018)                                         | 0                 | 0                | 0                | 0                      |
| <i>Trichoplax</i> sp. H2 strain Panama      | NOWV00000000/WGS<br>GFSF01000000/TSA                | (Kamm, et al. 2018)<br>(Kamm, et al. 2018)                                               | 0                 | 0                | 0                | 0                      |
| <i>Trichoplax</i> sp. strain H4 isolate TR1 | SRR8193748/TSA                                      | (Nosenko, et al. 2013)                                                                   | 0                 | 0                | 0                | 0                      |
| <i>Trichoplax</i> sp. strain H4 isolate TR2 | SRR8193747/TSA                                      | (Nosenko, et al. 2013)                                                                   | 0                 | 0                | 0                | 0                      |
| <i>Trichoplax</i> sp. strain H4 isolate TR3 | SRR8193749/TSA                                      | (Nosenko, et al. 2013)                                                                   | 0                 | 0                | 0                | 0                      |
| <i>Hoilungia hongkongensis</i>              | SRR5311040, SRR5311137/<br>WGS*<br>SRR5311041/TSA** | (Eitel, et al. 2018)                                                                     | 0                 | 0                | 0                | 0                      |
| <b>PORIFERA</b>                             |                                                     |                                                                                          |                   |                  |                  |                        |
| <i>Amphimedon queenslandica</i>             | ACUQ00000000/WGS<br>LIBEST_025611/EST               | (Srivastava, et al. 2010); DOE Joint<br>Genome Institute A. queenslandica EST<br>project | 6                 | 0                | 0                | 0                      |
| <i>Haliclona tubifera</i>                   | GFAV00000000/TSA                                    | (Guzman and Conaco 2016)                                                                 | 1                 | 0                | 0                | 0                      |

|                                                                        |                                                                            |                                                                                      |   |   |   |   |
|------------------------------------------------------------------------|----------------------------------------------------------------------------|--------------------------------------------------------------------------------------|---|---|---|---|
| <i>Halisarca caerulea</i>                                              | GFSI00000000/TSA                                                           | (Kenny, et al. 2018)                                                                 | 1 | 0 | 0 | 0 |
| <b>CTENOPHORA</b>                                                      |                                                                            |                                                                                      |   |   |   |   |
| <i>Mnemiopsis leidyi</i>                                               | GFAT00000000/TSA<br>AGCP00000000/WGS                                       | (Moroz, et al. 2014)<br>(Ryan, et al. 2013)                                          | 1 | 0 | 1 | 0 |
| <i>Hormiphora californensis</i>                                        | GGLO00000000/TSA                                                           | (Francis, et al. 2015)                                                               | 1 | 0 | 1 | 0 |
| <i>Pleurobranchia bachei</i>                                           | AVPN00000000/WGS                                                           | (Moroz, et al. 2014)                                                                 | 0 | 0 | 1 | 0 |
| <i>Pleurobranchia pileus</i>                                           | LIBEST_023403/EST<br>LIBEST_022668/EST<br>SRR3417589/EST<br>SRR6074514/TSA | (Alie, et al. 2011)<br>(Philippe, et al. 2009)<br>(Simion, et al. 2017)<br>Moroz Lab | 0 | 0 | 1 | 0 |
| <i>Beroe ovata</i>                                                     | UOYG00000000/WGS                                                           | (Babonis, et al. 2018)                                                               | 2 | 0 | 1 | 0 |
| <i>Beroe</i> sp.                                                       | ERR216194/EST                                                              | (Nosenko, et al. 2013)                                                               | 1 | 0 | 1 | 0 |
| <b>CNIDARIA</b>                                                        |                                                                            |                                                                                      |   |   |   |   |
| <b>Staurozoa</b>                                                       |                                                                            |                                                                                      |   |   |   |   |
| <i>Calvadosia cruxmelitensis</i>                                       | HAHC00000000/TSA<br>OFHS00000000/WGS                                       | (Kayal, et al. 2018)<br>(Ohdera, et al. 2019)                                        | 1 | 0 | 0 | 0 |
| <i>Craterolophus convolvulus</i>                                       | HAGZ00000000/TSA                                                           | (Kayal, et al. 2018)                                                                 | 1 | 0 | 0 | 0 |
| <i>Haliclystus auricula</i>                                            | HAHA00000000/TSA                                                           | (Kayal, et al. 2018)                                                                 | 1 | 0 | 0 | 0 |
| <i>Haliclystus sanjuanensis</i>                                        | HAHB00000000/TSA                                                           | (Kayal, et al. 2018)                                                                 | 1 | 0 | 0 | 0 |
| <b>Anthozoa</b>                                                        |                                                                            |                                                                                      |   |   |   |   |
| <i>Exaiptasia pallida</i>                                              | LJWW00000000/WGS<br>JV124988, JV096676,<br>JV089924/TSA                    | (Baumgarten, et al. 2015)<br>(Lehnert, et al. 2012)                                  | 1 | 0 | 1 | 0 |
| <i>Nematostella vectensis</i>                                          | ABAV00000000/WGS<br>HADN00000000/TSA                                       | (Putnam, et al. 2007)<br>(Babonis, et al. 2016)                                      | 2 | 0 | 1 | 0 |
| <i>Edwardsiella lineata</i> - <u>assembly of all life cycle stages</u> | WGS/TSA in<br>EdwardsiellaBase                                             | (Stefanik, et al. 2014)                                                              | 1 | 0 | 1 | 0 |
| <i>Edwardsiella carnea</i> - Swedish isolate, <u>parasite stage</u>    | GGGB00000000/TSA                                                           | (Dnyansagar, et al. 2018)                                                            | 1 | 0 | 1 | 0 |
| <i>Edwardsiella carnea</i> - Swedish isolate, <u>free-living stage</u> | GGGD00000000/TSA                                                           | (Dnyansagar, et al. 2018)                                                            | 2 | 0 | 1 | 0 |
| <i>Acropora digitifera</i>                                             | BACK00000000/WGS<br>GIAQ01000000/TSA                                       | (Shinzato, et al. 2015)<br>(Gajigan, et al. 2017)                                    | 3 | 0 | 1 | 0 |



|                                                        |                                                                                |                                                                                       |   |   |   |   |
|--------------------------------------------------------|--------------------------------------------------------------------------------|---------------------------------------------------------------------------------------|---|---|---|---|
| <i>Clytia hemisphaerica</i>                            | ERP112953/WGS<br>HAMV0100000/TSA                                               | (Leclere, et al. 2019)<br>(Leclere, et al. 2019)                                      | 1 | 0 | 1 | 0 |
| <i>Porpita porpita</i>                                 | GHBA00000000/TSA                                                               | (Khalturin, et al. 2019)                                                              | 0 | 0 | 1 | 0 |
| <i>Velella velella</i>                                 | GHAZ00000000/TSA                                                               | (Khalturin, et al. 2019)                                                              | 5 | 0 | 3 | 0 |
| <i>Physalia physalis</i>                               | GHBB00000000/TSA                                                               | (Khalturin, et al. 2019)                                                              | 1 | 0 | 1 | 0 |
| <i>Hydra vulgaris</i> (syn. <i>H. magnipapillata</i> ) | ACZU00000000/WGS                                                               | (Chapman, et al. 2010)                                                                | 2 | 0 | 6 | 0 |
|                                                        | ABRM00000000/WGS                                                               | (Chapman, et al. 2010)                                                                | 2 | 0 | 6 | 0 |
|                                                        | HAAD00000000/TSA                                                               | (Wenger and Galliot 2013)                                                             | 1 | 0 | 0 | 0 |
|                                                        | GGKH00000000/TSA                                                               | (Wenger, et al. 2019)                                                                 | 1 | 0 | 4 | 0 |
|                                                        | HAAC00000000/TSA                                                               | (Wenger and Galliot 2013)                                                             | 1 | 0 | 6 | 0 |
|                                                        | GEVZ01000000 /TSA                                                              | (Rodrigues, et al. 2016)                                                              | 0 | 0 | 4 | 0 |
|                                                        | GAOL00000000/TSA                                                               | (Juliano, et al. 2014)                                                                | 2 | 0 | 4 | 0 |
| <i>Millepora alcicornis</i>                            | SRX323169-SRR935384/WGS<br>GFAS00000000/TSA                                    | (Ruiz-Ramos and Baums 2014)<br>(Ortiz-Gonzalez, et al. 2017)                          | 2 | 0 | 0 | 0 |
| <i>Podocoryna carnea</i>                               | GBEH00000000/TSA                                                               | (Hensel, et al. 2014)                                                                 | 2 | 0 | 2 | 0 |
|                                                        | GCHV00000000/TSA                                                               | (Sanders and Cartwright 2015)                                                         |   |   |   |   |
| <i>Turritopsis</i> sp. SK-2016                         | IAAF00000000                                                                   | (Hasegawa, et al. 2016)                                                               | 1 | 0 | 0 | 0 |
| <b>Polypodiozoa</b>                                    |                                                                                |                                                                                       |   |   |   |   |
| <i>Polypodium hydriforme</i> - <u>parasite stage</u>   | SRX687102-<br>SRR1558173/WGS<br>GBGH00000000/TSA                               | (Chang, et al. 2015)<br><br>(Shpirer, et al. 2014)                                    | 1 | 0 | 3 | 0 |
| <b>MYXOZOA</b>                                         |                                                                                |                                                                                       |   |   |   |   |
| <b>Malacosporea</b>                                    |                                                                                |                                                                                       |   |   |   |   |
| <i>Tetracapsuloides bryosalmonae</i>                   | LIBEST_027541/EST<br>LIBEST_028454/EST<br>LIBEST_028455/EST<br>figshare***/TSA | Holland group<br>(Kumar, et al. 2015)<br>(Kumar, et al. 2015)<br>(Faber et al., 2021) | 0 | 1 | 0 | 0 |
| <i>Buddenbrockia plumatellae</i>                       | LIBEST_021265/EST                                                              | (Jiménez-Guri, et al. 2007)                                                           | 0 | 1 | 0 | 0 |
| <b>Myxosporea</b>                                      |                                                                                |                                                                                       |   |   |   |   |
| <i>Ceratonova shasta</i>                               | Illumina HiSeq 2000/WGS<br>SRR6782113/TSA                                      | Bartholomew group (unpublished)<br>(Alama-Bermejo, et al. 2020)                       | 0 | 1 | 0 | 0 |
| <i>Enteromyxum leei</i>                                | LDNA00000000/WGS                                                               | (Shpirer, et al. 2014; Chang, et al. 2015)                                            | 0 | 4 | 0 | 0 |

|                               |                                                           |                                            |   |   |   |   |
|-------------------------------|-----------------------------------------------------------|--------------------------------------------|---|---|---|---|
|                               | Illumina NovaSeq6000 and Oxford Nanopore (FLO-MIN106)/WGS | Palenzuela group (unpublished)             |   |   |   |   |
|                               | Illumina NovaSeq6000/TSA                                  | Palenzuela group (unpublished)             |   |   |   |   |
| <i>Enteromyxum scopthalmi</i> | Illumina NovaSeq6000 and Oxford Nanopore (FLO-MIN106)/WGS | Palenzuela group (unpublished)             | 0 | 3 | 0 | 0 |
|                               | Illumina HiSeq2000 and Illumina NovaSeq6000/ TSA          | Palenzuela group (unpublished)             |   |   |   |   |
| <i>Kudoa ivatai</i>           | JRUX000000000/WGS                                         | (Chang, et al. 2015)                       |   |   |   |   |
|                               | JRUY000000000/WGS                                         | (Chang, et al. 2015)                       | 0 | 3 | 0 | 0 |
|                               | GBGI000000000/TSA                                         | (Chang, et al. 2015)                       |   |   |   |   |
| <i>Myxidium lieberkuehni</i>  | SRX9268956/TSA                                            | (Kyslík, et al, In Press)                  | 0 | 5 | 0 | 0 |
| <i>Nephrocystidium pickii</i> | SRX9268957/TSA                                            | (Kyslík, et al. In Press)                  | 0 | 2 | 0 | 0 |
| <i>Myxobolus cerebralis</i>   | SRR628302/WGS                                             | (Nesnidal, et al. 2013)                    | 0 | 2 | 0 | 0 |
|                               | GBKL000000000/TSA                                         | (Chang, et al. 2015)                       |   |   |   |   |
| <i>Myxobolus pendula</i>      | SRX1269149 - SRR2472984, SRR2472987, SRR2472989/TSA       | (Foux, et al. 2015)                        | 0 | 2 | 0 | 0 |
| <i>Sphaeromyxa zaharoni</i>   | LDMZ000000000/WGS                                         | (Shpirer, et al. 2014; Chang, et al. 2015) | 0 | 3 | 0 | 0 |
| <i>Sphaerospora molnari</i>   | Illumina NovaSeq 6000 and Oxford Nanopore PromethION/WGS  | Holzer group (unpublished)                 | 0 | 2 | 0 | 0 |
|                               | PRJNA522909/TSA                                           | (Hartigan, et al. 2020)                    |   |   |   |   |
| <i>Thelohanellus kitauei</i>  | JWZT010000000/WGS                                         | (Yang, et al. 2014)                        | 0 | 7 | 0 | 0 |
|                               | SRR1103279/TSA                                            | (Yang, et al. 2014)                        |   |   |   |   |

<sup>x</sup> previously identified as *Monosiga ovata* (Carr et al. 2017); <sup>\*</sup> assembly at <https://bitbucket.org/molpalmuc/hoilungia-genome>; <sup>\*\*</sup> assembly at <https://bitbucket.org/molpalmuc/hoilungia-genome>; <sup>\*\*\*</sup> the intersect transcriptome available from [www.figshare.com](http://www.figshare.com), 10.6084/m9.figshare.11889672.

Abbreviations: TSA = Transcriptome Shotgun Assembly; WGS = Whole Genome Shotgun; EST = Expressed Sequence Tag.

## References

- Alama-Bermejo G, Meyer E, Atkinson SD, Holzer AS, Wiśniewska MM, Kolísko M, Bartholomew JL. 2020. Transcriptome-wide comparisons and virulence gene polymorphisms of host-associated genotypes of the cnidarian parasite *Ceratonova shasta* in salmonids. *Genome Biology and Evolution* 12:1258–1276.
- Alie A, Leclere L, Jager M, Dayraud C, Chang PR, Le Guyader H, Queinnec E, Manuel M. 2011. Somatic stem cells express Piwi and Vasa genes in an adult ctenophore: Ancient association of "germline genes" with stemness. *Developmental Biology* 350:183-197.
- Ames C, Ryan J, Bely A, Cartwright P, Collins A. 2016. A new transcriptome and transcriptome profiling of adult and larval tissue in the box jellyfish *Alatina alata*: an emerging model for studying venom, vision and sex. *BMC Genomics* 17:650.
- Babonis LS, DeBiasse MB, Francis WR, Christianson LM, Moss AG, Haddock SHD, Martindale MQ, Ryan JF. 2018. Integrating embryonic development and evolutionary history to characterize tentacle-specific cell types in a ctenophore. *Molecular Biology and Evolution* 35:2940-2956.
- Babonis LS, Martindale MQ, Ryan JF. 2016. Do novel genes drive morphological novelty? An investigation of the nematosomes in the sea anemone *Nematostella vectensis*. *BMC Evolutionary Biology* 16:114.
- Barshis D, Ladner J, Oliver T, Seneca F, Traylor-Knowles N, Palumbi S. 2013. Genomic basis for coral resilience to climate change. *Proceedings of the National Academy of Sciences of the United States of America* 110:1387-1392.
- Baumgarten S, Simakov O, Esherick LY, Liew YJ, Lehnert EM, Michell CT, Li Y, Hambleton EA, Guse A, Oates ME, et al. 2015. The genome of *Aiptasia*, a sea anemone model for coral symbiosis. *Proceedings of the National Academy of Sciences of the United States of America* 112:11893-11898.
- Brekhman V, Malik A, Haas B, Sher N, Lotan T. 2015. Transcriptome profiling of the dynamic life cycle of the scyphozoan jellyfish *Aurelia aurita*. *BMC Genomics* 16:74.
- Brinkman D, Jia X, Potriquet J, Kumar D, Dash D, Kvaskoff D, Mulvenna J. 2015. Transcriptome and venom proteome of the box jellyfish *Chironex fleckeri*. *BMC Genomics* 16:407.
- Dnyansagar R, Zimmermann B, Moran Y, Praher D, Sundberg P, Moller L, Technau U. 2018. Dispersal and speciation: The cross Atlantic relationship of two parasitic cnidarians. *Molecular Phylogenetics and Evolution* 126:346-355.
- Eitel M, Francis W, Varoqueaux F, Daraspe J, Osigus H, Krebs S, Vargas S, Blum H, Williams G, Schierwater B, et al. 2018. Comparative genomics and the nature of placozoan species. *PLoS Biology* 16: e3000032.
- Faber M, Yoon S, Shaw S, de Paiva Alves E, Wang B, Qi Z, Okamura B, Hartikainen H, Secombes CJ, Holland JW. 2021. Comparative transcriptomics and host-specific parasite gene expression profiles inform on drivers of proliferative kidney disease. *Scientific Reports* 11:2149.
- Fairclough S, Chen Z, Kramer E, Zeng Q, Young S, Robertson H, Begovic E, Richter D, Russ C, Westbrook M, et al. 2013. Premetazoan genome evolution and the regulation of cell differentiation in the choanoflagellate *Salpingoeca rosetta*. *Genome Biology* 14:R15.
- Foxx J, Ringuette M, Desser SS, Siddall ME. 2015. In silico hybridization enables transcriptomic illumination of the nature and evolution of Myxozoa. *BMC Genomics* 16:840.

- Francis W, Shaner N, Christianson L, Powers M, Haddock S. 2015. Occurrence of isopenicillin-N-synthase homologs in bioluminescent ctenophores and implications for coelenterazine biosynthesis. *PLoS ONE* 10: e0128742.
- Gajigan AP, Diaz LA, Conaco C. 2017. Resilience of the prokaryotic microbial community of *Acropora digitifera* to elevated temperature. *Microbiologyopen* 6: e00478.
- Ge J, Liu C, Tan J, Bian L, Chen S. 2018. Transcriptome analysis of scyphozoan jellyfish *Rhopilema esculentum* from polyp to medusa identifies potential genes regulating strobilation. *Development Genes and Evolution* 228:243-254.
- Guzman C, Conaco C. 2016. Comparative transcriptome analysis reveals insights into the streamlined genomes of haplosclerid demosponges. *Scientific Reports* 6: 18774.
- Hasegawa Y, Watanabe T, Takazawa M, Ohara O, Kubota S. 2016. De novo assembly of the transcriptome of *Turritopsis*, a jellyfish that repeatedly rejuvenates. *Zoological Science* 33:366-371.
- Hartigan A, Kosakyan A, Pecková H, Eszterbauer E, Holzer AS. 2020. Transcriptome of *Sphaerospora molnari* (Cnidaria, Myxosporea) blood stages provides proteolytic arsenal as potential therapeutic targets against sphaerosporosis in common carp. *BMC Genomics* 21: 404.
- Hensel K, Lotan, Tamar, Sanders, M. S, Cartwright, Pauly, Frank, Uri. 2014. Lineage-specific evolution of cnidarian Wnt ligands. *Evolution & Development* 16:259-269.
- Chang ES, Neuhof M, Rubinstein ND, Diamant A, Philippe H, Huchon D, Cartwright P. 2015. Genomic insights into the evolutionary origin of Myxozoa within Cnidaria. *Proceedings of the National Academy of Sciences of the United States of America* 112:14912-14917.
- Chapman JA, Kirkness EF, Simakov O, Hampson SE, Mitros T, Weinmaier T, Rattei T, Balasubramanian PG, Borman J, Busam D, et al. 2010. The dynamic genome of *Hydra*. *Nature* 464:592-596.
- Jiménez-Guri E, Philippe H, Okamura B, Holland PWH. 2007. *Buddenbrockia* is a cnidarian worm. *Science* 317:116-118.
- Juliano C, Reich A, Liu N, Gotzfried J, Zhong M, Uman S, Reenan R, Wessel G, Steele R, Lin H. 2014. PIWI proteins and PIWI-interacting RNAs function in *Hydra* somatic stem cells. *Proceedings of the National Academy of Sciences of the United States of America* 111:337-342.
- Kamm K, Osigus H, Stadler P, DeSalle R, Schierwater B. 2018. *Trichoplax* genomes reveal profound admixture and suggest stable wild populations without bisexual reproduction. *Scientific Reports* 8: 11168.
- Kayal E, Bentlage B, Pankey MS, Ohdera AH, Medina M, Plachetzki DC, Collins AGR, Ryan FJ. 2018. Phylogenomics provides a robust topology of the major cnidarian lineages and insights on the origins of key organismal traits. *BMC Evolutionary Biology* 18:68.
- Kenny N, de Goeij J, de Bakker D, Whalen C, Berezikov E, Riesgo A. 2018. Towards the identification of ancestrally shared regenerative mechanisms across the Metazoa: A Transcriptomic case study in the Demosponge *Halisarca caerulea*. *Marine Genomics* 37:135-147.
- Khalturin K, Shinzato C, Khalturina M, Hamada M, Fujie M, Koyanagi R, Kanda M, Goto H, Anton-Erxleben F, Toyokawa M, et al. 2019. Medusozoan genomes inform the evolution of the jellyfish body plan. *Nature Ecology & Evolution* 3:811-822.

- Kim H-M, Weber JA, Lee N, Park SG, Cho YS, Bhak Y, Lee N, Jeon Y, Jeon S, Luria V, et al. 2019. The genome of the giant Nomura's jellyfish sheds light on the early evolution of active predation. *BMC Biology* 17:28.
- King N, Westbrook M, Young S, Kuo A, Abedin M, Chapman J, Fairclough S, Hellsten U, Isogai Y, Letunic I, et al. 2008. The genome of the choanoflagellate *Monosiga brevicollis* and the origin of metazoans. *Nature* 451:783-788.
- Kumar G, Abd-Elfattah A, El-Matbouli M. 2015. Identification of differentially expressed genes of brown trout (*Salmo trutta*) and rainbow trout (*Oncorhynchus mykiss*) in response to *Tetracapsuloides bryosalmonae* (Myxozoa). *Parasitology Research* 114:929-939.
- Kyslík J, Kosakyan A, Nenarokov S, Holzer AS, Fiala I. 2021. Myxozoan minicollagen gene repertoire is not simplified by the parasitic lifestyle: Computational identification of a novel myxozoan minicollagen gene. *BMC Genomics*. In Press.
- Leclerc L, Horin C, Chevalier S, Lapebie P, Dru P, Peron S, Jager M, Condamine T, Pottin K, Romano S, et al. 2019. The genome of the jellyfish *Clytia hemisphaerica* and the evolution of the cnidarian life-cycle. *Nature Ecology & Evolution* 3:801-810.
- Lehnert EM, Burriesci MS, Pringle JR. 2012. Developing the anemone *Aiptasia* as a tractable model for cnidarian-dinoflagellate symbiosis: the transcriptome of aposymbiotic *A. pallida*. *BMC Genomics* 13:271.
- Li YF, Zhou ZC, Tian ML, Tian Y, Dong Y, Li SL, Liu WD, He CB. 2017. Exploring single nucleotide polymorphism (SNP), microsatellite (SSR) and differentially expressed genes in the jellyfish (*Rhopilema esculentum*) by transcriptome sequencing. *Marine Genomics* 34:31-37.
- Liu G, Zhou Y, Liu D, Wang Q, Ruan Z, He Q, Zhang L. 2015. Global transcriptome analysis of the tentacle of the jellyfish *Cyanea capillata* using deep sequencing and expressed sequence tags: Insight into the toxin- and degenerative disease-related transcripts. *PLoS ONE* 10: e0142680.
- Mohamed AR, Cumbo V, Harii S, Shinzato C, Chan CX, Ragan MA, Bourne DG, Willis BL, Ball EE, Satoh N, et al. 2016. The transcriptomic response of the coral *Acropora digitifera* to a competent *Symbiodinium* strain: the symbiosome as an arrested early phagosome. *Molecular Ecology* 25:3127-3141.
- Moroz L, Kocot K, Citarella M, Dosung S, Norekian T, Povolotskaya I, Grigorenko A, Dailey C, Berezikov E, Buckley K, et al. 2014. The ctenophore genome and the evolutionary origins of neural systems. *Nature* 510:109-114.
- Nesnidal M, Helmkampf M, Bruchhaus I, El-Matbouli M, Hausdorf B. 2013. Agent of whirling disease meets orphan worm: Phylogenomic analyses firmly place Myxozoa in Cnidaria. *PLoS ONE* 8: e54576.
- Nielsen S, Koch T, Hauser F, Garm A, Grimmelikhuijzen C. 2019. De novo transcriptome assembly of the cubomedusa *Tripedalia cystophora*, including the analysis of a set of genes involved in peptidergic neurotransmission. *BMC Genomics* 20:175.
- Nosenko T, Schreiber F, Adamska M, Adamski M, Eitel M, Hammel J, Maldonado M, Muller WEG, Nickel M, Schierwater B, et al. 2013. Deep metazoan phylogeny: When different genes tell different stories. *Molecular Phylogenetics and Evolution* 67:223-233.



- Ohdera A, Ames CL, Dikow RB, Kayal E, Chiodin M, Busby B, La S, Pirro S, Collins AG, Medina M, et al. 2019. Box, stalked, and upside-down? Draft genomes from diverse jellyfish (Cnidaria, Acraspeda) lineages: *Alatina alata* (Cubozoa), *Calvadosia cruxmelitensis* (Staurozoa), and *Cassiopea xamachana* (Scyphozoa). *GigaScience* 8:7.
- Ohdera AH, Abrams MJ, Ames CL, Baker DM, Suescun-Bolivar LP, Collins AG, Freeman CJ, Gamero-Mora E, Goulet TL, Hofmann DK, et al. 2018. Upside-down but headed in the right direction: Review of the highly versatile *Cassiopea xamachana* system. *Frontiers in Ecology and Evolution* 6.
- Ortiz-Gonzalez I, Rivera-Vicens R, Schizas N. 2017. De novo transcriptome assembly of the hydrocoral *Millepora alcicornis* (branching fire coral) from the Caribbean. *Marine Genomics* 32:27-30.
- Philippe H, Derelle R, Lopez P, Pick K, Borchellini C, Boury-Esnault N, Vacelet J, Renard E, Houliston E, Queinnec E, et al. 2009. Phylogenomics revives traditional views on deep animal relationships. *Current Biology* 19:706-712.
- Putnam NH, Srivastava M, Hellsten U, Dirks B, Chapman J, Salamov A, Terry A, Shapiro H, Lindquist E, Kapitonov VV, et al. 2007. Sea anemone genome reveals ancestral eumetazoan gene repertoire and genomic organization. *Science* 317:86-94.
- Richter D, Fozouni P, Eisen M, King N. 2018. Gene family innovation, conservation and loss on the animal stem lineage. *Elife* 7: e34226.
- Rodrigues M, Ostermann T, Kremeser L, Lindner H, Beisel C, Berezikov E, Hobmayer B, Ladurner P. 2016. Profiling of adhesive-related genes in the freshwater cnidarian *Hydra magnipapillata* by transcriptomics and proteomics. *Biofouling* 32:1115-1129.
- Ruiz-Ramos D, Baums I. 2014. Microsatellite abundance across the Anthozoa and Hydrozoa in the phylum Cnidaria. *BMC Genomics* 15: 939.
- Ryan J, Pang K, Schnitzler C, Nguyen A, Moreland R, Simmons D, Koch B, Francis W, Havlak P, Smith S, et al. 2013. The genome of the ctenophore *Mnemiopsis leidyi* and its implications for cell type evolution. *Science* 342: 1242592.
- Sanders S, Cartwright P. 2015. Interspecific differential expression analysis of RNA-Seq data yields insight into life cycle variation in hydractiniid hydrozoans. *Genome Biology and Evolution* 7:2417-2431.
- Shinzato C, Mungpakdee S, Arakaki N, Satoh N. 2015. Genome-wide SNP analysis explains coral diversity and recovery in the Ryukyu Archipelago. *Scientific Reports* 5: 18211.
- Shpirer E, Chang E, Diamant A, Rubinstein N, Cartwright P, Huchon D. 2014. Diversity and evolution of myxozoan minicollagens and nematogalectins. *BMC Evolutionary Biology* 14:205.
- Simion P, Philippe H, Baurain D, Jager M, Richter DJ, Di Franco A, Roure B, Satoh N, Queinnec E, Ereskovsky A, et al. 2017. A Large and consistent phylogenomic dataset supports sponges as the sister group to all other animals. *Current Biology* 27:958-967.
- Srivastava M, Begovic E, Chapman J, Putnam N, Hellsten U, Kawashima T, Kuo A, Mitros T, Salamov A, Carpenter M, et al. 2008. The *Trichoplax* genome and the nature of placozoans. *Nature* 454:955-U919.
- Srivastava M, Simakov O, Chapman J, Fahey B, Gauthier M, Mitros T, Richards G, Conaco C, Dacre M, Hellsten U, et al. 2010. The *Amphimedon queenslandica* genome and the evolution of animal complexity. *Nature* 466:720-U723.

- Stefanik DJ, Lubinski TJ, Granger BR, Byrd AL, Reitzel AM, DeFilippo L, Lorenc A, Finnerty JR. 2014. Production of a reference transcriptome and transcriptomic database (EdwardsiellaBase) for the lined sea anemone, *Edwardsiella lineata*, a parasitic cnidarian. *BMC Genomics* 15:19.
- Wenger Y, Buzgariu W, Perruchoud C, Loichot G, Galliot B. 2019. Generic and context-dependent gene modulations during *Hydra* whole body regeneration. bioRxiv:587147.
- Wenger Y, Galliot B. 2013. RNAseq versus genome-predicted transcriptomes: a large population of novel transcripts identified in an Illumina-454 *Hydra* transcriptome. *BMC Genomics* 14:204.
- Yang YL, Xiong J, Zhou ZG, Huo FM, Miao W, Ran C, Liu YC, Zhang JY, Feng JM, Wang M, et al. 2014. The genome of the myxosporean *Thelohanellus kitauei* shows adaptations to nutrient acquisition within its fish host. *Genome Biology and Evolution* 6:3182-3198.
- Ying H, Hayward DC, Cooke I, Wang W, Moya A, Siemering KR, Sprungala S, Ball EE, Forêt S, Miller DJ. 2019. The whole-genome sequence of the coral *Acropora millepora*. *Genome Biology Evolution* 11:1374-1379.
- Yuyama I, Ishikawa M, Nozawa M, Yoshida M, Ikeo K. 2018. Transcriptomic changes with increasing algal symbiont reveal the detailed process underlying establishment of coral-algal symbiosis. *Scientific Reports* 8: 16802.
