# Supplementary material for: Evolutionary Analysis of Cystatins of Early-Emerging Metazoans Reveals a Novel Subtype in Parasitic Cnidarians
Source: MDPI journal article supplement (doi:10.3390/biology10020110), 2021-02-03
Supplement: s1 [file s1]

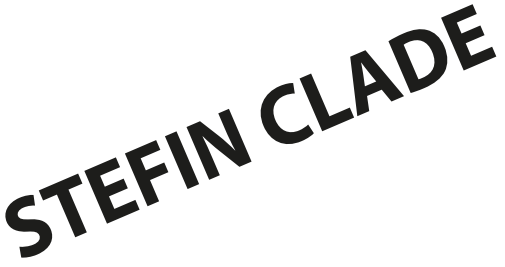

**TYPE 2 CYSTATIN CLADE**

*Giardia* cystatin was used as the outgroup. Colours of branches correspond to Figure 3.



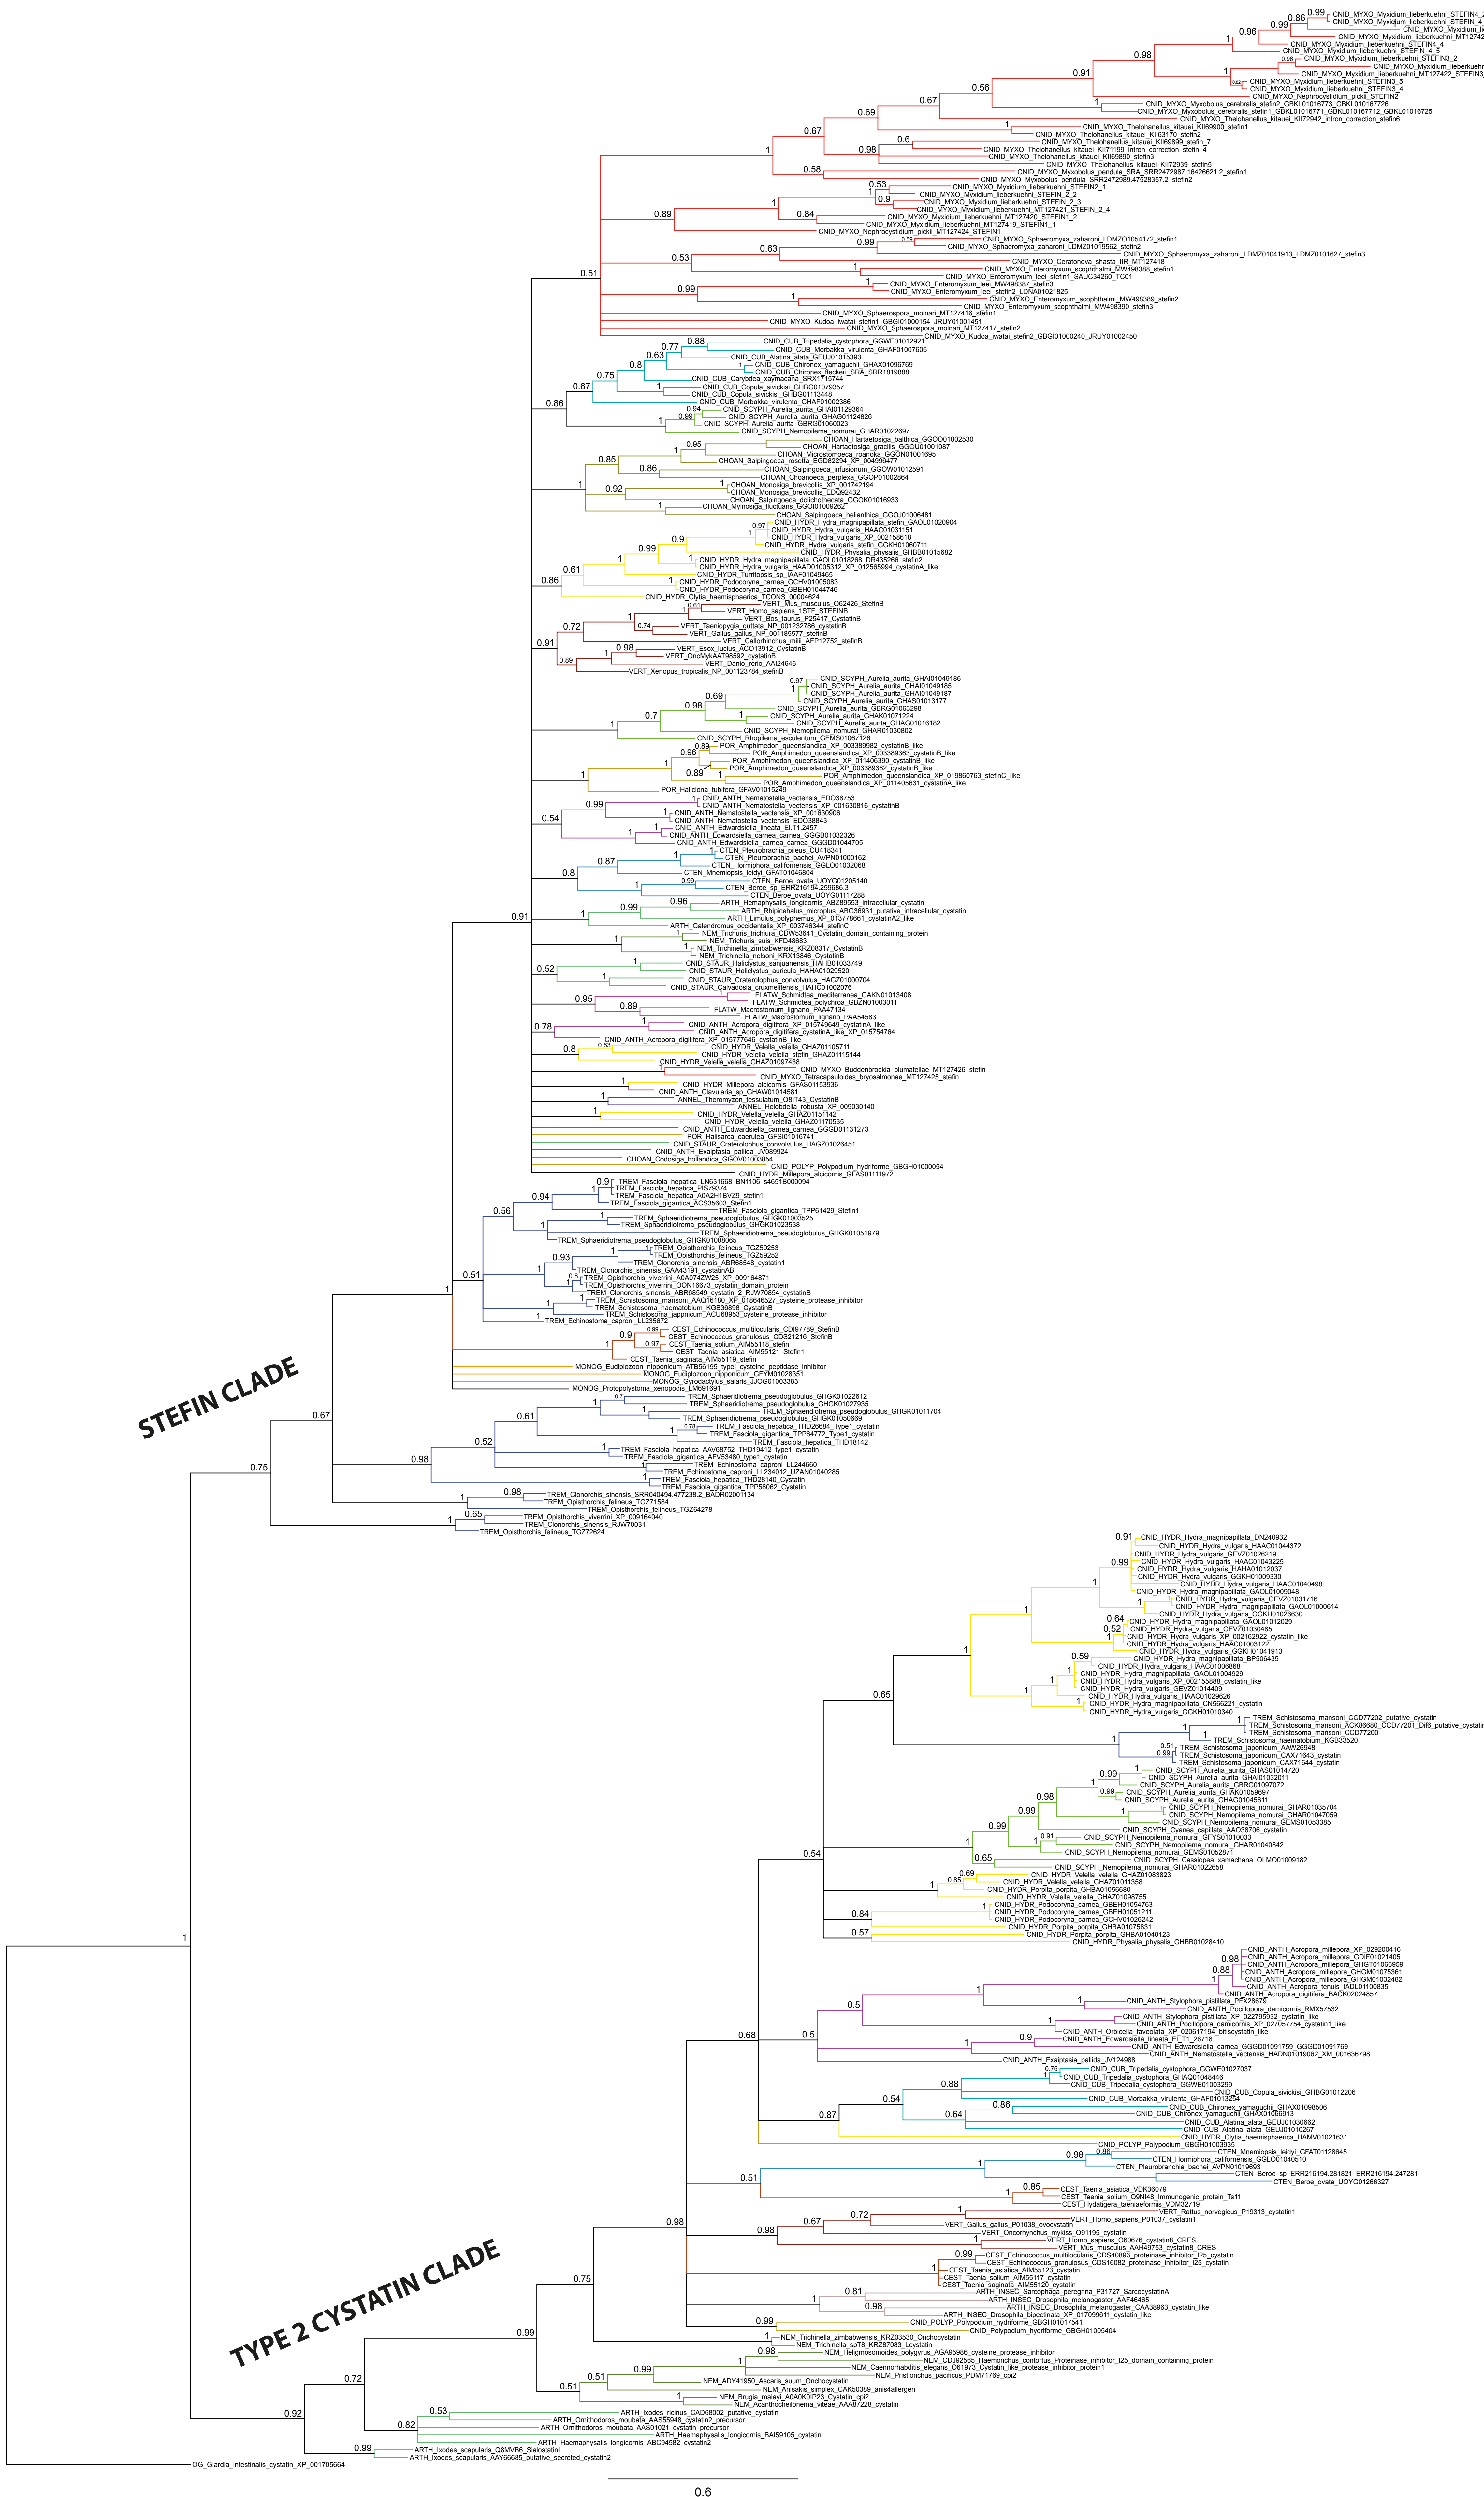

Bayesian inference phylogenetic tree of the cystatin superfamily represented in the Metazoa and Choanoflagellata with posterior probabilities shown at each node. *Giardia* cystatin was used as the outgroup. Colours of branches correspond to Figure 3.
