# Supplementary material for: Evolutionary Analysis of Cystatins of Early-Emerging Metazoans Reveals a Novel Subtype in Parasitic Cnidarians
Source: MDPI journal article supplement (doi:10.3390/biology10020110), 2021-02-03
Supplement: s1 [file s1]

**Table S3.** The list of groups/species used for phylogenetic analyses. Parasite species are shaded red, free-living species are shaded green and species with both parasite and free-living life cycle stages are shaded yellow.

| EARLY-DIVERGING METAZOAN GROUPS                        | DERIVED METAZOAN GROUPS               |
|--------------------------------------------------------|---------------------------------------|
| <b>PORIFERA</b>                                        | <b>TREMATODA</b>                      |
| <i>Amphimedon queenslandica</i>                        | <i>Clonorchis sinensis</i>            |
| <i>Haliclona tubifera</i>                              | <i>Echinostoma caproni</i>            |
| <i>Halisarca caerulea</i>                              | <i>Fasciola gigantica</i>             |
| <b>CTENOPHORA</b>                                      | <i>Fasciola hepatica</i>              |
| <i>Beroe ovata</i>                                     | <i>Opisthorchis felineus</i>          |
| <i>Beroe</i> sp.                                       | <i>Opisthorchis viverrini</i>         |
| <i>Hormiphora californensis</i>                        | <i>Schistosoma haematobium</i>        |
| <i>Mnemiopsis leidyi</i>                               | <i>Schistosoma japonicum</i>          |
| <i>Pleurobrachia pileus</i>                            | <i>Schistosoma mansoni</i>            |
| <i>Pleurobranchia bachei</i>                           | <i>Sphaeridiotrema pseudoglobulus</i> |
| <b>CNIDARIA/STAUROZOA</b>                              | <b>NEMATODA</b>                       |
| <i>Calvadosia cruxmelitensis</i>                       | <i>Acanthocheilonema viteae</i>       |
| <i>Craterolophus convolvulus</i>                       | <i>Anisakis simplex</i>               |
| <i>Haliclystus auricula</i>                            | <i>Ascaris suum</i>                   |
| <i>Haliclystus sanjuanensis</i>                        | <i>Brugia malayi</i>                  |
| <b>CNIDARIA/ANTHOZOA</b>                               | <i>Caenorhabditis elegans</i>         |
| <i>Acropora digitifera</i>                             | <i>Haemonchus contortus</i>           |
| <i>Acropora hyacinthus</i>                             | <i>Heligmosomoides polygyrus</i>      |
| <i>Acropora millepora</i>                              | <i>Pristionchus pacificus</i>         |
| <i>Acropora tenuis</i>                                 | <i>Trichinella</i> sp.                |
| <i>Clavularia</i> sp.                                  | <i>Trichinella nelsoni</i>            |
| <i>Edwardsiella carnea</i>                             | <i>Trichinella zimbabwensis</i>       |
| <i>Edwardsiella lineata</i>                            | <i>Trichuris suis</i>                 |
| <i>Exaiptasia pallida</i>                              | <i>Trichuris trichiura</i>            |
| <i>Nematostella vectensis</i>                          | <b>MONOGENEA</b>                      |
| <i>Orbicella faveolata</i>                             | <i>Eudiplozoon nipponicum</i>         |
| <i>Pocillopora damicornis</i>                          | <i>Gyrodactylus salaris</i>           |
| <i>Stylophora pistillata</i>                           | <i>Protopolystoma xenopodis</i>       |
| <b>CNIDARIA/SCYPHOZOA</b>                              | <b>CESTODA</b>                        |
| <i>Aurelia aurita</i>                                  | <i>Echinococcus granulosus</i>        |
| <i>Cassiopea xamachana</i>                             | <i>Echinococcus multilocularis</i>    |
| <i>Cyanea capillata</i>                                | <i>Hydatigera taeniaeformis</i>       |
| <i>Nemopilema nomurai</i>                              | <i>Taenia asiatica</i>                |
| <i>Rhopilema esculentum</i>                            | <i>Taenia saginata</i>                |
| <b>CNIDARIA/CUBOZOA</b>                                | <i>Taenia solium</i>                  |
| <i>Alatina alata</i>                                   | <b>ANNELIDA</b>                       |
| <i>Copula sivickisi</i>                                | <i>Helobdella robusta</i>             |
| <i>Chironex fleckeri</i>                               | <i>Theromyzon tessulatum</i>          |
| <i>Chironex yamaguchii</i>                             | <b>TURBELLARIA</b>                    |
| <i>Morbakka virulenta</i>                              | <i>Macrostomum lignano</i>            |
| <i>Tripedalia cystophora</i>                           | <i>Schmidtea mediterranea</i>         |
| <b>CNIDARIA/HYDROZOA</b>                               | <i>Schmidtea polychroa</i>            |
| <i>Clytia hemisphaerica</i>                            | <b>ARTHROPODA/CHELICERATA</b>         |
| <i>Hydra vulgaris</i> (syn. <i>H. magnipapillata</i> ) | <i>Galendromus occidentalis</i>       |
| <i>Millepora alcicornis</i>                            | <i>Haemaphysalis longicornis</i>      |
| <i>Physalia physalis</i>                               | <i>Ixodes ricinus</i>                 |
| <i>Podocoryna carnea</i>                               | <i>Ixodes scapularis</i>              |
| <i>Porpita porpita</i>                                 | <i>Limulus polyphemus</i>             |
| <i>Turritopsis</i> sp.                                 | <i>Ornithodoros moubata</i>           |

|                                      |                                |
|--------------------------------------|--------------------------------|
| <i>Velella velella</i>               | <i>Rhipicephalus microplus</i> |
| <b>CNIDARIA/POLYPODIOZOA</b>         | <b>ARTHROPODA/INSECTA</b>      |
| <i>Polypodium hydriforme</i>         | <i>Drosophila bipectinata</i>  |
| <b>CNIDARIA/MYXOZOA</b>              | <i>Drosophila melanogaster</i> |
| <i>Buddenbrockia plumatellae</i>     | <i>Sarcophaga peregrina</i>    |
| <i>Ceratonova shasta</i>             | <b>VERTEBRATA</b>              |
| <i>Enteromyxum leei</i>              | <i>Bos taurus</i>              |
| <i>Enteromyxum scophthalmi</i>       | <i>Callorhinchus milii</i>     |
| <i>Kudoa iwatai</i>                  | <i>Danio rerio</i>             |
| <i>Myxidium lieberkuehni</i>         | <i>Esox lucius</i>             |
| <i>Myxobolus cerebralis</i>          | <i>Gallus gallus</i>           |
| <i>Myxobolus pendula</i>             | <i>Homo sapiens</i>            |
| <i>Nephrocystidium pickii</i>        | <i>Mus musculus</i>            |
| <i>Sphaeromyxa zaharoni</i>          | <i>Oncorhynchus mykiss</i>     |
| <i>Sphaerospora molnari</i>          | <i>Rattus norvegicus</i>       |
| <i>Tetracapsuloides bryosalmonae</i> | <i>Taeniopygia guttata</i>     |
| <i>Thelohanellus kitauei</i>         | <i>Xenopus tropicalis</i>      |
| <b>NON-METAZOAN GROUPS</b>           | <b>OUTGROUP</b>                |
| <b>CHOANOFLAGELLATA</b>              | <b>EXCAVATA</b>                |
| <i>Codosiga hollandica</i>           | <i>Giardia intestinalis</i>    |
| <i>Hartaetosiga balthica</i>         |                                |
| <i>Hartaetosiga gracilis</i>         |                                |
| <i>Choanoeca perplexa</i>            |                                |
| <i>Microstomoeca roanoka</i>         |                                |
| <i>Monosiga brevicollis</i>          |                                |
| <i>Mylnosiga fluctuans</i>           |                                |
| <i>Salpingoeca dolichothecata</i>    |                                |
| <i>Salpingoeca helianthica</i>       |                                |
| <i>Salpingoeca infusionum</i>        |                                |
| <i>Salpingoeca rosetta</i>           |                                |
